# Supplementary material for: Tubular Injury Biomarkers to Predict CKD and Hypertension at 3 Months Post-Cisplatin in Children
Source: PubMed Central journal article supplement (PMC11219117; doi:10.34067/kid.0000000000000448), 2024-04-26
Supplement: kidney360-5-821-s002.pdf [file kidney360-5-821-s002.pdf]

**Supplemental Material PDF**

**Supplemental Table 1. Urine AKI Biomarker Concentrations during Cisplatin Therapy in Participants with or without CKD or Hypertension at 3 Months Post-Cisplatin Treatment End.**

**Supplemental Table 2. Univariable and Multivariable Associations of Biomarkers with CKD and Hypertension at 3 Months Post-Cisplatin Treatment End**

**Supplemental Table 3: Univariable and Multivariable Associations of Biomarker Quartiles with CKD and Hypertension at 3 Months Post-Cisplatin Treatment End**

**Supplemental Table 4: Area Under the Receiver Operating Characteristics Curve for Sympercent Change in Urine AKI Biomarkers to Predict CKD and Hypertension at 3 Months Post-Cisplatin Treatment.**

**Supplemental Table 1. Urine AKI Biomarker Concentrations during Cisplatin Therapy in Participants with or without CKD or Hypertension at 3 Months Post-Cisplatin Treatment End.**

| Timepoint                                        | 3 Months                             |                                     |
|--------------------------------------------------|--------------------------------------|-------------------------------------|
|                                                  | Median (IQR), n                      | Median (IQR), n                     |
| <b>NGAL (ng/mg creatinine)</b>                   |                                      |                                     |
|                                                  | <b>CKD</b>                           | <b>No CKD</b>                       |
| <b>EV Pre</b>                                    | 15.77 (6.63-49.05), 48               | 14.06 (6.76-24.19), 65              |
| <b>EV Post</b>                                   | 16.50 (6.23-65.25), 49               | 10.16 (5.35-23.60), 64              |
| <b>EV Discharge</b>                              | <b>28.27 (9.56-76.20), 48</b>        | <b>12.71 (5.01-34.36), 61</b>       |
| <b>LV Pre</b>                                    | 13.33 (5.38-49.79), 37               | 15.38 (4.79-26.92), 52              |
| <b>LV Post</b>                                   | 20.42 (8.07-61.16), 40               | 10.17 (5.49-23.76), 52              |
| <b>LV Discharge</b>                              | 15.81 (5.62-71.33), 38               | 12.58 (5.24-27.82), 47              |
|                                                  | <b>HTN</b>                           | <b>No HTN</b>                       |
| <b>EV Pre</b>                                    | 16.62 (14.06-45.64), 17              | 14.54 (6.62-30.42), 103             |
| <b>EV Post</b>                                   | 16.50 (5.94-21.98), 17               | 11.30 (5.29-28.81), 104             |
| <b>EV Discharge</b>                              | 34.36 (3.97-68.64), 15               | 15.05 (6.74-43.79)*, 101            |
| <b>LV Pre</b>                                    | 12.30 (6.94-28.39), 12               | 15.11 (5.01-38.50), 86              |
| <b>LV Post</b>                                   | 18.67 (5.70-33.04), 13               | 12.41 (5.28-26.78), 86              |
| <b>LV Discharge</b>                              | 23.89 (5.99-57.78), 12               | 15.39 (5.57-30.75), 83              |
| <b>KIM-1 (pg/mg creatinine)</b>                  |                                      |                                     |
|                                                  | <b>CKD</b>                           | <b>No CKD</b>                       |
| <b>EV Pre</b>                                    | <b>542.82 (196.88-1101.27), 48</b>   | <b>368.65 (152.65-705.31), 65</b>   |
| <b>EV Post</b>                                   | 321.11 (185.19-856.47), 49           | 213.89 (145.20-492.03), 64          |
| <b>EV Discharge</b>                              | <b>2415.76 (483.51-5099.19)*, 48</b> | <b>666.18 (257.24-3027.97)*, 61</b> |
| <b>LV Pre</b>                                    | 603.57 (257.46-1001.11), 37          | 442.83 (200.61-990.87), 52          |
| <b>LV Post</b>                                   | 374.44 (189.04-1365.83), 40          | 242.34 (172.11-643.48), 52          |
| <b>LV Discharge</b>                              | 1848.79 (755.43-4689.72)*, 38        | 842.84 (341.54-3388.68)*, 47        |
|                                                  | <b>HTN</b>                           | <b>No HTN</b>                       |
| <b>EV Pre</b>                                    | 248.47 (157.10-399.19), 17           | 457.53 (185.19-820.37), 103         |
| <b>EV Post</b>                                   | 321.11 (185.19-1082.96), 17          | 230.55 (151.52-569.33), 104         |
| <b>EV Discharge</b>                              | 2674.11 (259.28-5211.95)*, 15        | 1468.02 (394.49-3303.32)*, 101      |
| <b>LV Pre</b>                                    | 338.77 (125.98-3029.81), 12          | 504.90 (209.22-976.85), 86          |
| <b>LV Post</b>                                   | 522.54 (192.90-5334.44), 13          | 351.06 (185.19-783.95), 86          |
| <b>LV Discharge</b>                              | 2429.28 (668.40-5360.03), 12         | 1049.26 (373.92-3388.68)*, 83       |
| <b>TIMP-2*IGFBP-7 ((ng/ml)<sup>2</sup>/1000)</b> |                                      |                                     |
|                                                  | <b>CKD</b>                           | <b>No CKD</b>                       |
| <b>EV Pre</b>                                    | 0.014 (0.001-0.045), 51              | 0.015 (0.002-0.053), 66             |
| <b>EV Post</b>                                   | 0.002 (0.0005-0.006), 50             | 0.001 (0.0005-0.003), 66            |
| <b>EV Discharge</b>                              | 0.007 (0.003-0.042)*, 48             | 0.006 (0.001-0.016)*, 63            |
| <b>LV Pre</b>                                    | 0.012 (0.002-0.033), 39              | 0.026 (0.005-0.086), 52             |
| <b>LV Post</b>                                   | 0.002 (0.001-0.010), 41              | 0.001 (0.0004-0.005), 52            |
| <b>LV Discharge</b>                              | 0.006 (0.002-0.033)*, 39             | 0.004 (0.001-0.021)*, 48            |
|                                                  | <b>HTN</b>                           | <b>No HTN</b>                       |
| <b>EV Pre</b>                                    | <b>0.003 (0.002-0.014), 17</b>       | <b>0.020 (0.002-0.054), 107</b>     |

|                     |                          |                           |
|---------------------|--------------------------|---------------------------|
| <b>EV Post</b>      | 0.001 (0.0003-0.002), 17 | 0.002 (0.001-0.004), 107  |
| <b>EV Discharge</b> | 0.007 (0.003-0.068)*, 16 | 0.006 (0.002-0.019)*, 102 |
| <b>LV Pre</b>       | 0.004 (0.001-0.022), 12  | 0.015 (0.003-0.059), 88   |
| <b>LV Post</b>      | 0.003 (0.001-0.009), 13  | 0.002 (0.001-0.006), 87   |
| <b>LV Discharge</b> | 0.004 (0.002-0.021)*, 12 | 0.004 (0.001-0.022)*, 84  |

Results stratified by time of cisplatin infusion. Bolded values represent a significant difference between Outcome and No Outcome groups by Mann-Whitney U Test:  $P < 0.05$ .

\*Biomarker levels are significantly different across the three time points (pre, post, discharge) within AKI or non-AKI groups by Skillings-Mack Test,  $P < 0.05$

Abbreviations: CKD: Chronic Kidney Injury, HTN: Hypertension, IQR, interquartile range, Pre: pre-cisplatin infusion, Post: post-cisplatin infusion, Discharge: near hospital discharge, EV: Early Visit, LV: Late Visit, IGFBP-7: insulin-like growth factor-binding protein 7, KIM-1: kidney injury molecule-1, NGAL: neutrophil gelatinase-associated lipocalin, TIMP-2: tissue inhibitor of metalloproteinase-2.

**Supplementary Table 2: Univariable and Multivariable Associations of Biomarkers with CKD and Hypertension at 3 Months Post-Cisplatin Treatment End**

| Time of Collection                               | CKD                                   |                                     | HTN                                   |                                     |
|--------------------------------------------------|---------------------------------------|-------------------------------------|---------------------------------------|-------------------------------------|
|                                                  | <i>Unadjusted Odds Ratio (95% CI)</i> | <i>Adjusted Odds Ratio (95% CI)</i> | <i>Unadjusted Odds Ratio (95% CI)</i> | <i>Adjusted Odds Ratio (95% CI)</i> |
| <b>NGAL (ng/mg creatinine)</b>                   |                                       |                                     |                                       |                                     |
| <b>EV Pre-Infusion</b>                           | 1.18 (0.88 - 1.60)                    | 1.13 (0.77 - 1.67)                  | 0.97 (0.66 - 1.44)                    | 1.05 (0.65 - 1.71)                  |
| <b>EV Post-Infusion</b>                          | 1.23 (0.94 - 1.61)                    | 1.15 (0.82 - 1.64)                  | 1.02 (0.71 - 1.48)                    | 1.13 (0.69 - 1.88)                  |
| <b>EV Discharge</b>                              | <b>1.43 (1.07 - 1.92)</b>             | <b>1.52 (1.04 - 2.26)</b>           | 1.09 (0.74 - 1.63)                    | 1.09 (0.64 - 1.87)                  |
| <b>LV Pre-Infusion</b>                           | 1.09 (0.81 - 1.50)                    | 1.02 (0.68 - 1.55)                  | 0.81 (0.52 - 1.26)                    | 0.75 (0.44 - 1.32)                  |
| <b>LV Post-Infusion</b>                          | 1.32 (0.95 - 1.86)                    | 1.21 (0.79 - 1.87)                  | 1.00 (0.65 - 1.56)                    | 0.88 (0.52 - 1.52)                  |
| <b>LV Discharge</b>                              | 1.16 (0.87 - 1.56)                    | 1.01 (0.70 - 1.47)                  | 1.21 (0.79 - 1.85)                    | 0.95 (0.53 - 1.74)                  |
| <b>KIM-1 (pg/mg creatinine)</b>                  |                                       |                                     |                                       |                                     |
| <b>EV Pre-Infusion</b>                           | <b>1.41 (1.01 - 1.97)</b>             | <b>1.62 (1.11 - 2.38)</b>           | 0.68 (0.43 - 1.10)                    | 0.65 (0.38 - 1.13)                  |
| <b>EV Post-Infusion</b>                          | 1.07 (0.88 - 1.33)                    | 1.04 (0.84 - 1.30)                  | 1.26 (0.91 - 1.77)                    | 1.17 (0.79 - 1.76)                  |
| <b>EV Discharge</b>                              | <b>1.47 (1.12 - 1.94)</b>             | <b>1.39 (1.05 - 1.86)</b>           | 1.08 (0.76 - 1.56)                    | 0.85 (0.58 - 1.26)                  |
| <b>LV Pre-Infusion</b>                           | 1.28 (0.92 - 1.79)                    | 1.23 (0.88 - 1.74)                  | 0.94 (0.64 - 1.39)                    | 0.83 (0.56 - 1.26)                  |
| <b>LV Post-Infusion</b>                          | 1.24 (0.94 - 1.66)                    | 1.18 (0.88 - 1.59)                  | 1.46 (0.98 - 2.21)                    | 1.17 (0.74 - 1.86)                  |
| <b>LV Discharge</b>                              | 1.20 (0.91 - 1.59)                    | 1.05 (0.78 - 1.43)                  | 1.10 (0.73 - 1.67)                    | 0.80 (0.53 - 1.24)                  |
| <b>TIMP-2*IGFBP-7 ((ng/ml)<sup>2</sup>/1000)</b> |                                       |                                     |                                       |                                     |
| <b>EV Pre-Infusion</b>                           | 0.99 (0.84 - 1.17)                    | 1.06 (0.89 - 1.28)                  | 0.76 (0.60 - 0.97)                    | 0.77 (0.58 - 1.04)                  |
| <b>EV Post-Infusion</b>                          | 1.18 (0.92 - 1.54)                    | 1.27 (0.95 - 1.71)                  | 0.79 (0.54 - 1.18)                    | 0.96 (0.60 - 1.56)                  |
| <b>EV Discharge</b>                              | 1.18 (0.97 - 1.44)                    | 1.16 (0.94 - 1.43)                  | 1.08 (0.83 - 1.41)                    | 0.96 (0.70 - 1.33)                  |
| <b>LV Pre-Infusion</b>                           | 0.84 (0.69 - 1.03)                    | 0.90 (0.73 - 1.12)                  | 0.85 (0.65 - 1.11)                    | 0.88 (0.63 - 1.23)                  |
| <b>LV Post-Infusion</b>                          | 1.24 (0.96 - 1.63)                    | 1.09 (0.82 - 1.47)                  | 1.18 (0.81 - 1.71)                    | 0.97 (0.60 - 1.56)                  |

|                     |                    |                    |                    |                    |
|---------------------|--------------------|--------------------|--------------------|--------------------|
| <b>LV Discharge</b> | 1.13 (0.91 - 1.41) | 1.03 (0.81 - 1.31) | 1.04 (0.77 - 1.43) | 0.72 (0.46 - 1.15) |
|---------------------|--------------------|--------------------|--------------------|--------------------|

Variables included in the multivariable model for CKD: sex, age at cisplatin treatment start <3 years, SCr-AKI during treatment, baseline estimated or measured GFR, and acyclovir use in 1 month before 3-month visit; Variables included in the adjusted model for hypertension: sex, age at cisplatin treatment start <3 years, and SCr-AKI during cisplatin treatment.

**Supplemental Table 3: Univariable and Multivariable Associations of Biomarker Quartiles with CKD and Hypertension at 3 Months Post-Cisplatin Treatment End**

|                                |           |                         | CKD                        |                            | HTN                    |                      |
|--------------------------------|-----------|-------------------------|----------------------------|----------------------------|------------------------|----------------------|
|                                | #         | Concentration (min-max) | Unadjusted OR (95% CI)     | Adjusted OR (95% CI)       | Unadjusted OR (95% CI) | Adjusted OR (95% CI) |
| <b>NGAL (ng/mg creatinine)</b> |           |                         |                            |                            |                        |                      |
| <b>EV Pre-Infusion</b>         |           |                         |                            |                            |                        |                      |
| <b>Q1</b>                      | <b>38</b> | <b>0.23 - 6.62</b>      | <b>Reference</b>           | <b>Reference</b>           | <b>Reference</b>       | <b>Reference</b>     |
| <b>Q2</b>                      | <b>37</b> | <b>6.64 - 14.61</b>     | 0.76 (0.26 - 2.22)         | 0.81 (0.25 - 2.67)         | 0.75 (0.15 - 3.69)     | 0.57 (0.08 - 3.91)   |
| <b>Q3</b>                      | <b>38</b> | <b>15.09 - 36.31</b>    | 0.56 (0.19 - 1.68)         | 0.71 (0.21 - 2.34)         | 1.16 (0.28 - 4.80)     | 1.85 (0.36 - 9.55)   |
| <b>Q4</b>                      | <b>37</b> | <b>36.68 - 710.68</b>   | 1.67 (0.57 - 4.84)         | 1.6 (0.38 - 6.69)          | 1.41 (0.34 - 5.90)     | 1.28 (0.17 - 9.86)   |
| <b>EV Post-Infusion</b>        |           |                         |                            |                            |                        |                      |
| <b>Q1</b>                      | <b>37</b> | <b>0.55 - 5.57</b>      | <b>Reference</b>           | <b>Reference</b>           | <b>Reference</b>       | <b>Reference</b>     |
| <b>Q2</b>                      | <b>37</b> | <b>5.68 - 12.29</b>     | 0.94 (0.31 - 2.93)         | 0.76 (0.23 - 2.55)         | 0.54 (0.09 - 3.19)     | 0.68 (0.09 - 5.06)   |
| <b>Q3</b>                      | <b>37</b> | <b>12.45 - 28.7</b>     | 1.23 (0.43 - 3.54)         | 0.98 (0.29 - 3.32)         | 2.33 (0.62 - 8.72)     | 2.38 (0.46 - 12.39)  |
| <b>Q4</b>                      | <b>37</b> | <b>28.91 - 665.46</b>   | 2.47 (0.83 - 7.39)         | 2.00 (0.50 - 7.94)         | 0.81 (0.16 - 3.96)     | 1.25 (0.16 - 9.72)   |
| <b>EV Discharge</b>            |           |                         |                            |                            |                        |                      |
| <b>Q1</b>                      | <b>37</b> | <b>0.61 - 6.57</b>      | <b>Reference</b>           | <b>Reference</b>           | <b>Reference</b>       | <b>Reference</b>     |
| <b>Q2</b>                      | <b>36</b> | <b>6.74 - 15.48</b>     | 1.77 (0.55 - 5.66)         | 1.62 (0.46 - 5.72)         | 0.45 (0.08 - 2.65)     | 0.63 (0.10 - 3.96)   |
| <b>Q3</b>                      | <b>37</b> | <b>15.8 - 54.70</b>     | 2.55 (0.84 - 7.72)         | 2.82 (0.79 - 10.08)        | 0.65 (0.13 - 3.17)     | 0.70 (0.10 - 3.76)   |
| <b>Q4</b>                      | <b>36</b> | <b>55.29 - 1346.7</b>   | <b>4.50 (1.49 - 13.56)</b> | <b>5.47 (1.23 - 23.84)</b> | 1.97 (0.49 - 7.99)     | 2.92 (0.42 - 20.42)  |
| <b>LV Pre-Infusion</b>         |           |                         |                            |                            |                        |                      |
| <b>Q1</b>                      | <b>30</b> | <b>0.21 - 5.38</b>      | <b>Reference</b>           | <b>Reference</b>           | <b>Reference</b>       | <b>Reference</b>     |
| <b>Q2</b>                      | <b>30</b> | <b>5.48 - 14.90</b>     | 1.35 (0.40 - 4.50)         | 1.23 (0.34 - 4.47)         | 3.16 (0.55 - 18.11)    | 2.06 (0.30 - 14.00)  |
| <b>Q3</b>                      | <b>30</b> | <b>15.31 - 40.30</b>    | 0.58 (0.18 - 1.91)         | 0.71 (0.20 - 2.57)         | 2.18 (0.36 - 13.11)    | 2.88 (0.40 - 20.91)  |
| <b>Q4</b>                      | <b>30</b> | <b>40.44 - 813.92</b>   | 1.83 (0.56 - 6.03)         | 1.74 (0.39 - 7.75)         | 0.57 (0.05 - 6.76)     | 0.53 (0.03 - 8.42)   |
| <b>LV Post-Infusion</b>        |           |                         |                            |                            |                        |                      |
| <b>Q1</b>                      | <b>31</b> | <b>0.85 - 5.29</b>      | <b>Reference</b>           | <b>Reference</b>           | <b>Reference</b>       | <b>Reference</b>     |
| <b>Q2</b>                      | <b>31</b> | <b>5.32 - 12.23</b>     | 0.40 (0.11 - 1.48)         | 0.39 (0.10 - 1.63)         | 1.15 (0.21 - 6.35)     | 1.14 (0.17 - 7.82)   |

|                                 |    |                    |                            |                            |                     |                     |
|---------------------------------|----|--------------------|----------------------------|----------------------------|---------------------|---------------------|
| Q3                              | 31 | 12.58 - 32.86      | 1.84 (0.58 - 5.87)         | 1.77 (0.46 - 6.82)         | 0.96 (0.18 - 5.24)  | 1.16 (0.17 - 7.99)  |
| Q4                              | 30 | 33.04 - 879.57     | 1.73 (0.53 - 5.72)         | 1.43 (0.32 - 6.27)         | 1.61 (0.32 - 8.12)  | 1.41 (0.17 - 11.57) |
| <b>LV Discharge</b>             |    |                    |                            |                            |                     |                     |
| Q1                              | 29 | 0.56 - 5.67        | Reference                  | Reference                  | Reference           | Reference           |
| Q2                              | 29 | 5.81 - 16.23       | 1.36 (0.42 - 4.4)          | 0.96 (0.26 - 3.51)         | 1.89 (0.29 - 12.51) | 1.05 (0.12 - 9.35)  |
| Q3                              | 29 | 17.34 - 35.16      | 0.47 (0.13 - 1.69)         | 0.45 (0.11 - 1.88)         | 1.04 (0.14 - 8.04)  | 0.89 (0.86 - 9.31)  |
| Q4                              | 29 | 36.43 - 1348.49    | <b>3.9 (1.06 - 14.39)</b>  | 2.89 (0.57 - 14.67)        | 3.53 (0.61 - 20.38) | 1.64 (0.16 - 16.96) |
| <b>KIM-1 (pg/mg creatinine)</b> |    |                    |                            |                            |                     |                     |
| <b>EV Pre-Infusion</b>          |    |                    |                            |                            |                     |                     |
| Q1                              | 38 | 21.30 - 185.12     | Reference                  | Reference                  | Reference           | Reference           |
| Q2                              | 37 | 185.19 - 394.69    | 1.89 (0.62 - 5.77)         | 2.00 (0.58 - 6.93)         | 0.62 (0.16 - 2.40)  | 0.52 (0.11 - 2.52)  |
| Q3                              | 38 | 396.67 - 844.68    | 2.57 (0.86 - 7.62)         | <b>3.92 (1.16 - 13.23)</b> | 0.35 (0.08 - 1.48)  | 0.29 (0.05 - 1.52)  |
| Q4                              | 37 | 857.12 - 21628.24  | <b>3.44 (1.13 - 10.43)</b> | <b>6.01 (1.69 - 21.44)</b> | 0.45 (0.10 - 1.93)  | 0.54 (0.09 - 3.13)  |
| <b>EV Post-Infusion</b>         |    |                    |                            |                            |                     |                     |
| Q1                              | 37 | 0.57 - 154.58      | Reference                  | Reference                  | Reference           | Reference           |
| Q2                              | 37 | 157.83 - 235.87    | 0.94 (0.31 - 2.83)         | 0.69 (0.21 - 2.27)         | 3.36 (0.62 - 18.19) | 2.03 (0.32 - 12.78) |
| Q3                              | 37 | 243.59 - 618.95    | 1.40 (0.49 - 4.02)         | 1.19 (0.39 - 3.63)         | 2.07 (0.35 - 12.27) | 2.20 (0.31 - 15.77) |
| Q4                              | 37 | 619.88 - 41537.04  | 2.13 (0.72 - 6.32)         | 1.64 (0.50 - 5.34)         | 2.92 (0.52 - 16.42) | 1.89 (0.26 - 13.69) |
| <b>EV Discharge</b>             |    |                    |                            |                            |                     |                     |
| Q1                              | 37 | 0.63 - 394.49      | Reference                  | Reference                  | Reference           | Reference           |
| Q2                              | 36 | 410.93 - 1523.86   | 1.83 (0.60 - 5.59)         | 1.15 (0.33 - 4.02)         | 0.39 (0.07 - 2.16)  | 0.22 (0.03 - 1.50)  |
| Q3                              | 37 | 1528.11 - 4037.06  | 3.02 (0.99 - 9.19)         | 2.38 (0.73 - 7.77)         | 0.65 (0.14 - 3.02)  | 0.27 (0.04 - 1.74)  |
| Q4                              | 36 | 4179.01 - 23320.99 | <b>3.15 (1.09 - 9.10)</b>  | 2.26 (0.71 - 7.18)         | 1.08 (0.28 - 4.21)  | 0.38 (0.07 - 2.00)  |
| <b>LV Pre-Infusion</b>          |    |                    |                            |                            |                     |                     |
| Q1                              | 30 | 0.56 - 192.90      | Reference                  | Reference                  | Reference           | Reference           |
| Q2                              | 30 | 201.85 - 507.00    | 0.56 (0.17 - 1.90)         | 0.55 (0.15 - 2.00)         | 0.37 (0.06 - 2.09)  | 0.46 (0.06 - 3.37)  |
| Q3                              | 30 | 530.99 - 1128.17   | 1.73 (0.53 - 5.72)         | 1.50 (0.42 - 5.38)         | 0.17 (0.02 - 1.55)  | 0.06 (0.00 - 0.76)  |

|                                                  |           |                           |                            |                    |                                       |                                       |
|--------------------------------------------------|-----------|---------------------------|----------------------------|--------------------|---------------------------------------|---------------------------------------|
| <b>Q4</b>                                        | <b>30</b> | <b>1148.89 - 65811.85</b> | 1.18 (0.35 - 4.02)         | 0.98 (0.26 - 3.64) | 0.99 (0.23 - 4.26)                    | 0.62 (0.10 - 3.76)                    |
| <b>LV Post-Infusion</b>                          |           |                           |                            |                    |                                       |                                       |
| <b>Q1</b>                                        | <b>39</b> | <b>0.63 - 185.19</b>      | <b>Reference</b>           | <b>Reference</b>   | <b>Reference</b>                      | <b>Reference</b>                      |
| <b>Q2</b>                                        | <b>23</b> | <b>192.90 - 350.46</b>    | 1.60 (0.48 - 5.31)         | 1.50 (0.42 - 5.29) | 1.24 (0.19 - 8.29)                    | 1.00 (0.12 - 8.58)                    |
| <b>Q3</b>                                        | <b>31</b> | <b>351.67 - 923.93</b>    | 1.69 (0.56 - 5.11)         | 1.28 (0.38 - 4.31) | 0.75 (0.12 - 4.84)                    | 0.18 (0.02 - 1.85)                    |
| <b>Q4</b>                                        | <b>30</b> | <b>956.91 - 51711.11</b>  | 2.44 (0.76 - 7.82)         | 1.88 (0.51 - 6.96) | 3.11 (0.69 - 14.04)                   | 1.04 (0.16 - 6.71)                    |
| <b>LV Discharge</b>                              |           |                           |                            |                    |                                       |                                       |
| <b>Q1</b>                                        | <b>29</b> | <b>2.14 - 451.63</b>      | <b>Reference</b>           | <b>Reference</b>   | <b>Reference</b>                      | <b>Reference</b>                      |
| <b>Q2</b>                                        | <b>29</b> | <b>519 - 1343.19</b>      | 1.30 (0.39 - 4.34)         | 1.22 (0.35 - 4.34) | 1.05 (0.14 - 8.08)                    | 0.84 (0.09 - 7.54)                    |
| <b>Q3</b>                                        | <b>29</b> | <b>1445.00 - 4082.78</b>  | 2.29 (0.67 - 7.84)         | 1.86 (0.48 - 7.31) | 2.88 (0.50 - 16.48)                   | 1.29 (0.17 - 9.48)                    |
| <b>Q4</b>                                        | <b>29</b> | <b>4419.45 - 41388.89</b> | 1.88 (0.55 - 6.39)         | 1.14 (0.29 - 4.41) | 1.92 (0.29 - 12.72)                   | 0.52 (0.05 - 5.10)                    |
| <b>TIMP-2*IGFBP-7 ((ng/ml)<sup>2</sup>/1000)</b> |           |                           |                            |                    |                                       |                                       |
| <b>EV Pre-Infusion</b>                           |           |                           |                            |                    |                                       |                                       |
| <b>Q1</b>                                        | <b>39</b> | <b>0.00 - 0.001</b>       | <b>Reference</b>           | <b>Reference</b>   | <b>Reference</b>                      | <b>Reference</b>                      |
| <b>Q2</b>                                        | <b>38</b> | <b>0.001 - 0.013</b>      | 1.00 (0.34 - 2.93)         | 1.22 (0.37 - 4.04) | 1.60 (0.41 - 6.24)                    | 2.83 (0.43 - 18.63)                   |
| <b>Q3</b>                                        | <b>39</b> | <b>0.013 - 0.042</b>      | 0.92 (0.33 - 2.57)         | 1.43 (0.46 - 4.47) | 1.14 (0.29 - 4.53)                    | 3.19 (0.49 - 20.58)                   |
| <b>Q4</b>                                        | <b>38</b> | <b>0.045 - 1.879</b>      | 0.96 (0.34 - 2.73)         | 1.48 (0.46 - 4.70) | 1.00 (95% CI unable to be calculated) | 1.00 (95% CI unable to be calculated) |
| <b>EV Post-Infusion</b>                          |           |                           |                            |                    |                                       |                                       |
| <b>Q1</b>                                        | <b>39</b> | <b>0.000 - 0.000</b>      | <b>Reference</b>           | <b>Reference</b>   | <b>Reference</b>                      | <b>Reference</b>                      |
| <b>Q2</b>                                        | <b>38</b> | <b>0.001 - 0.002</b>      | 0.57 (0.20 - 1.62)         | 0.46 (0.14 - 1.49) | 0.40 (0.09 - 1.70)                    | 0.28 (0.05 - 1.48)                    |
| <b>Q3</b>                                        | <b>38</b> | <b>0.002 - 0.004</b>      | 1.09 (0.38 - 3.15)         | 1.08 (0.33 - 3.56) | 0.57 (0.15 - 2.19)                    | 0.62 (0.12 - 3.14)                    |
| <b>Q4</b>                                        | <b>38</b> | <b>0.004 - 1.056</b>      | 1.96 (0.70 - 5.48)         | 2.63 (0.83 - 8.27) | 0.41 (0.10 - 1.77)                    | 0.91 (0.17 - 4.94)                    |
| <b>EV Discharge</b>                              |           |                           |                            |                    |                                       |                                       |
| <b>Q1</b>                                        | <b>37</b> | <b>0.000 - 0.002</b>      | <b>Reference</b>           | <b>Reference</b>   | <b>Reference</b>                      | <b>Reference</b>                      |
| <b>Q2</b>                                        | <b>37</b> | <b>0.002 - 0.007</b>      | <b>3.64 (1.22 - 10.84)</b> | 2.96 (0.95 - 9.21) | 1.33 (0.27 - 6.53)                    | 0.74 (0.13 - 4.18)                    |
| <b>Q3</b>                                        | <b>37</b> | <b>0.007 - 0.032</b>      | 1.67 (0.55 - 5.01)         | 1.56 (0.49 - 9.21) | 1.04 (0.19 - 5.62)                    | 0.66 (0.10 - 4.34)                    |
| <b>Q4</b>                                        | <b>37</b> | <b>0.034 - 0.711</b>      | <b>3.11 (1.05 - 9.22)</b>  | 2.60 (0.82 - 8.27) | 2.45 (0.55 - 10.96)                   | 1.00 (0.18 - 5.64)                    |



| <b>LV Pre-Infusion</b>  |           |                      |                            |                            |                     |                     |
|-------------------------|-----------|----------------------|----------------------------|----------------------------|---------------------|---------------------|
| <b>Q1</b>               | <b>31</b> | <b>0.000 - 0.002</b> | <b>Reference</b>           | <b>Reference</b>           | <b>Reference</b>    | <b>Reference</b>    |
| <b>Q2</b>               | <b>30</b> | <b>0.002 - 0.012</b> | 0.74 (0.22 - 2.54)         | 1.00 (0.26 - 3.77)         | 0.70 (0.15 - 3.34)  | 0.63 (0.11 - 3.74)  |
| <b>Q3</b>               | <b>31</b> | <b>0.119 - 0.052</b> | 0.60 (0.19 - 1.94)         | 0.83 (0.23 - 2.95)         | 0.34 (0.06 - 1.91)  | 0.26 (0.04 - 1.83)  |
| <b>Q4</b>               | <b>30</b> | <b>0.054 - 0.654</b> | 0.34 (0.10 - 1.11)         | 0.59 (0.15 - 2.27)         | 0.35 (0.06 - 2.00)  | 0.63 (0.09 - 4.32)  |
| <b>LV Post-Infusion</b> |           |                      |                            |                            |                     |                     |
| <b>Q1</b>               | <b>31</b> | <b>0.000 - 0.001</b> | <b>Reference</b>           | <b>Reference</b>           | <b>Reference</b>    | <b>Reference</b>    |
| <b>Q2</b>               | <b>31</b> | <b>0.001 - 0.002</b> | 1.00 (0.29 - 3.46)         | 1.15 (0.31 - 4.28)         | 1.25 (0.19 - 8.23)  | 1.14 (0.14 - 9.34)  |
| <b>Q3</b>               | <b>31</b> | <b>0.002 - 0.006</b> | 2.17 (0.68 - 6.88)         | 1.50 (0.43 - 5.29)         | 1.82 (0.30 - 11.02) | 0.71 (0.08 - 6.03)  |
| <b>Q4</b>               | <b>31</b> | <b>0.006 - 0.162</b> | 2.60 (0.80 - 8.49)         | 1.69 (0.47 - 6.07)         | 1.90 (0.31 - 11.57) | 0.90 (0.11 - 7.49)  |
| <b>LV Discharge</b>     |           |                      |                            |                            |                     |                     |
| <b>Q1</b>               | <b>30</b> | <b>0.001 - 0.001</b> | <b>Reference</b>           | <b>Reference</b>           | <b>Reference</b>    | <b>Reference</b>    |
| <b>Q2</b>               | <b>29</b> | <b>0.001 - 0.005</b> | <b>6.30 (1.69 - 23.53)</b> | <b>6.00 (1.52 - 23.66)</b> | 7.20 (0.80 - 64.89) | 4.07 (0.40 - 41.09) |
| <b>Q3</b>               | <b>30</b> | <b>0.006 - 0.030</b> | 2.49 (0.68 - 9.19)         | 1.71 (0.42 - 6.93)         | 2.09 (0.18 - 24.61) | 0.22 (0.01 - 5.57)  |
| <b>Q4</b>               | <b>29</b> | <b>0.030 - 0.577</b> | <b>4.40 (1.17 - 16.57)</b> | 2.80 (0.68 - 11.57)        | 4.24 (0.41 - 44.27) | 0.45 (0.02 - 10.57) |

Variables included in the Adjusted model for CKD: sex, age at cisplatin treatment start <3 years, SCr-AKI during treatment, baseline estimated or measured GFR, and acyclovir use in 1 month before 3-month visit; Variables included in the adjusted model for hypertension: sex, age at cisplatin treatment start <3 years, and SCr-AKI during cisplatin treatment.

**Supplemental Table 4. Area Under the Receiver Operating Characteristics Curve for Sympercent Change in Urine AKI Biomarkers to Predict CKD and Hypertension at 3 Months Post-Cisplatin Treatment.**

| Time of Collection                               | AUC (95% CI) to Predict 3-Month CKD <sup>a</sup> | AUC (95% CI) to Predict 3-Month HTN <sup>b</sup> |
|--------------------------------------------------|--------------------------------------------------|--------------------------------------------------|
| <b>NGAL (ng/mg creatinine)</b>                   |                                                  |                                                  |
| EV Post - Pre                                    | 0.55 (0.44-0.66), 109                            | 0.57 (0.42-0.71), 117                            |
| EV DC - Pre                                      | 0.57 (0.46-0.68), 104                            | 0.59 (0.42-0.75), 111                            |
| LV Post - Pre                                    | 0.54 (0.40-0.67), 85                             | 0.53 (0.33-0.72), 94                             |
| LV DC - Pre                                      | 0.54 (0.40-0.67), 78                             | 0.56 (0.33-0.80), 90                             |
| LV Post - EV Pre                                 | 0.56 (0.44-0.69), 88                             | 0.53 (0.36-0.70), 95                             |
| LV DC - EV Pre                                   | 0.46 (0.33-0.59), 81                             | 0.62 (0.48-0.76), 91                             |
| <b>KIM-1 (pg/mg creatinine)</b>                  |                                                  |                                                  |
| EV Post - Pre                                    | 0.50 (0.39-0.62), 109                            | <b>0.73 (0.60-0.87), 117</b>                     |
| EV DC - Pre                                      | 0.56 (0.45-0.67), 104                            | 0.62 (0.42-0.82), 111                            |
| LV Post - Pre                                    | 0.43 (0.31-0.56), 85                             | 0.68 (0.50-0.86), 94                             |
| LV DC - Pre                                      | 0.45 (0.32-0.58), 78                             | 0.61 (0.40-0.83), 90                             |
| LV Post - EV Pre                                 | 0.54 (0.41-0.67), 88                             | <b>0.70 (0.52-0.89), 95</b>                      |
| LV DC - EV Pre                                   | 0.50 (0.37-0.63), 81                             | 0.62 (0.42-0.82), 91                             |
| <b>TIMP-2*IGFBP-7 ((ng/ml)<sup>2</sup>/1000)</b> |                                                  |                                                  |
| EV Post - Pre                                    | 0.56 (0.45-0.67), 115                            | 0.60 (0.46-0.75), 123                            |
| EV DC - Pre                                      | 0.54 (0.43-0.65), 110                            | <b>0.65 (0.51-0.80), 117</b>                     |
| LV Post - Pre                                    | <b>0.66 (0.54-0.78), 88</b>                      | 0.64 (0.49-0.79), 97                             |
| LV DC - Pre                                      | <b>0.65 (0.53-0.77), 82</b>                      | 0.60 (0.43-0.78), 93                             |
| LV Post - EV Pre                                 | 0.56 (0.44-0.68), 92                             | <b>0.72 (0.58-0.86), 99</b>                      |
| LV DC - EV Pre                                   | 0.55 (0.42-0.67), 86                             | <b>0.68 (0.54-0.82), 95</b>                      |

Results stratified by time of cisplatin infusion. Bolded AUCs: 95% CI did not cross 0.5.

<sup>a</sup>For CKD analyses, 118 patients were included. N ranged between 78-116 depending on time point combinations.

<sup>b</sup>For HTN analyses, 125 patients were included. N ranged between 90-123 depending on time point combinations  
Abbreviations: CKD: Chronic Kidney Injury, HTN: Hypertension, AUC: Area Under the Curve, Pre: pre-cisplatin infusion, Post: post-cisplatin infusion, DC: near hospital discharge, EV: Early Visit, LV: Late Visit, IGFBP-7: insulin-like growth factor-binding protein 7, KIM-1: kidney injury molecule-1, NGAL: neutrophil gelatinase-associated lipocalin, TIMP-2: tissue inhibitor of metalloproteinase-2.
